# Supplementary material for: Genetic and oceanographic tools reveal high population connectivity and diversity in the endangered pen shell Pinna nobilis
Source: PubMed Central journal article supplement (PMC5859023; doi:10.1038/s41598-018-23004-2), 2018-03-19
Supplement: 41598_2018_23004_MOESM1_ESM.pdf [file 41598_2018_23004_MOESM1_ESM.pdf]

## Supplementary Tables for:

### Genetic and oceanographic tools reveal high population connectivity and diversity in the endangered pen shell *Pinna nobilis*

Marlene Wesselmann<sup>1,2</sup>, Mercedes González-Wangüemert<sup>1</sup>, Ester A. Serrão<sup>1</sup>, Aschwin H. Engelen<sup>1</sup>, Lionel Renault<sup>3</sup>, José R. García-March<sup>4</sup>, Carlos M. Duarte<sup>5</sup>, and Iris E. Hendriks<sup>2,6\*</sup>

<sup>1</sup>*CCMAR, Universidade do Algarve, Gambelas, 8005-139 Faro, Portugal.*

<sup>2</sup>*Global Change Department, IMEDEA, Instituto Mediterráneo de Estudios Avanzados, C/ Miquel Marqués 21, 07190 Esporles, Spain.*

<sup>3</sup>*Department of Atmospheric and Oceanic Sciences, University of California, Los Angeles, California, USA*

<sup>4</sup>*Instituto de Investigación en Medio ambiente y ciencia Marina (IMEDMAR-UCV), Universidad Católica de Valencia, C/Explanada del Puerto s/n, Calpe (Alicante).*

<sup>5</sup>*King Abdullah University of Science and Technology (KAUST), Red Sea Research Center, Thuwal 23955-6900, Saudia Arabia*

<sup>6</sup>*Biology department, University of the Balearic Islands (UIB), crta. Valldemossa km 7,5, 07122 Palma de Mallorca*

\*corresponding author: [iris@imedea.uib-csic.es](mailto:iris@imedea.uib-csic.es), tel. +34 971611359

**Table S1.** Sampling location and size for 24 populations of *Pinna nobilis* considered for the COI (243bp) analysis. Locations whose sequences were taken from Genbank: \*1 Sanna et al ., 2013 (18), \*2 Rabaoui et al., 2010 (17), \*3 Katsares et al., 2009 (16).

|                                         | <b>Location</b>      | <b>Label</b> | <b>N</b> |
|-----------------------------------------|----------------------|--------------|----------|
| <b>-Western Mediterranean Mainland-</b> | Banyuls              | BY           | 9        |
|                                         | The Ebro Delta       | DE           | 9        |
|                                         | Alicante             | AT           | 10       |
|                                         | Murcia               | MU           | 9        |
| <b>-Balearic Islands-</b>               | Ibiza                | IB           | 10       |
|                                         | Mallorca             | MA           | 10       |
| <b>-Elba Island-*1</b>                  | Capo Enfolà          | EL           | 10       |
| <b>-Corsica Island-*1</b>               | Cala Pesciu cane     | CP           | 12       |
|                                         | Isola Piana          | IP           | 13       |
| <b>-Sardinia Island-*1</b>              | Baia di Porto Conte  | BP           | 18       |
|                                         | Ospedale Marino      | OS           | 21       |
|                                         | Molara               | MO           | 11       |
|                                         | Capo Ceraso          | CC           | 13       |
|                                         | Origina di Siracusa  | OR           | 10       |
|                                         | Isola di la Madalena | MD           | 18       |
| <b>-Sicily Island-*1</b>                | Mondello             | MN           | 11       |
|                                         | Milazzo              | ML           | 10       |
|                                         | Origina di Siracussa | OG           | 15       |
| <b>-The Venetian Lagoon-*1</b>          | Ottagono Alberoni    | VE           | 20       |
| <b>-Tunisian Coast-*2</b>               | Monastir             | M            | 9        |
|                                         | El Bibane            | B            | 9        |
|                                         | El Ketef             | K            | 17       |
| <b>-Aegean Sea-*3</b>                   | Aggeloyesori         | AG           | 9        |
|                                         | Epanomi              | EP           | 9        |

**Table S2:** Genetic differentiation ( $F_{st}$ ), median oceanographic distance (km) and median oceanographic transport time (days) for each pair of population of *Pinna nobilis* sampled in six localities in the Western Mediterranean: Banyuls (BY), the Ebro Delta (DE), Alicante (AT), Murcia (MU), Ibiza (IB), Mallorca (MA).

| Pair of population | Genetic differentiation ( $F_{st}$ ) | Median oceanographic distance (km) | Median oceanographic time (days) | Minimum oceanographic time (days) |
|--------------------|--------------------------------------|------------------------------------|----------------------------------|-----------------------------------|
| MU - AT            | -0.0059                              | 757 ±135                           | 19 ±15                           | 4                                 |
| DE - IBZ           | -0.0037                              | 418 ±107                           | 33 ±9                            | 20                                |
| MU - IB            | -0.0036                              | 718 ±259                           | 31 ±9                            | 19                                |
| IB - MA            | -0.0016                              | 293 ±89                            | 25 ±21                           | 6                                 |
| AT - DE            | 0.0010                               | 926 ±380                           | 27 ±7                            | 16                                |
| AT - MA            | 0.0022                               | 886 ±118                           | 36 ±5                            | 23                                |
| DE - MU            | 0.0023                               | 1859 ±118                          | 59 ±13                           | 35                                |
| DE - MA            | 0.0024                               | 568 ±165                           | 37 15                            | 20                                |
| AT - IB            | 0.0056                               | 364 ±105                           | 35 ±10                           | 8                                 |
| BY - AT            | 0.0088                               | ≥1859                              | ≥59                              | ≥35                               |
| MU - MA            | 0.0120                               | ≥1859                              | ≥59                              | ≥35                               |
| BY - DE            | 0.0120                               | ≥1859                              | ≥59                              | ≥35                               |
| BY - MA            | 0.0166                               | ≥1859                              | ≥59                              | ≥35                               |
| BY - IB            | 0.0167                               | ≥1859                              | ≥59                              | ≥35                               |
| BY - MU            | 0.0180                               | ≥1859                              | ≥59                              | ≥35                               |

**Table S3:** Genetic diversity estimated using 243 bp COI sequences, for *Pinna nobilis* sampled in 24 Mediterranean populations (N: number of individuals, Hap: number of haplotypes and exclusive haplotypes in brackets, H: haplotype diversity,  $\Pi$ : nucleotide diversity). Banyuls (BY), the Ebro Delta (DE), Alicante (AT), Murcia (MU), Ibiza (IB), Mallorca (MA) Elba (EL), Cala Pesciu Cane (CP) and Isola Piana (IP) in Corsica, Baia di Porto Conte (BP), Ospedale Marino (OS), Molara (MO), Capo Ceraso (CC), Oristano (OR) and Isola di La Maddalena (MD) in Sardinia, Mondello (MN), Milazzo (ML) and Origina di Siracusa (OR) in Sicily, the Venetian Lagoon (VE), Monastir (M), El Bibane (B) and El Ketef (K) at the Tunisian Coast, and in the Aegean Sea: Epanomoi (EP) and Aggeloyesori (AG).

| Population | N  | Hap  | Polymorphic sites | H      | $\Pi$  |
|------------|----|------|-------------------|--------|--------|
| BY         | 9  | 4(0) | 3                 | 0.7500 | 0.0038 |
| DE         | 9  | 3(2) | 2                 | 0.4167 | 0.0018 |
| AT         | 10 | 7(2) | 9                 | 0.8667 | 0.0099 |
| MU         | 9  | 1(0) | 0                 | 0.0000 | 0.0000 |
| IB         | 10 | 4(1) | 3                 | 0.5333 | 0.0024 |
| MA         | 10 | 4(2) | 4                 | 0.5333 | 0.0032 |
| EL         | 10 | 4(2) | 5                 | 0.8000 | 0.0082 |
| CP         | 12 | 5(1) | 5                 | 0.5758 | 0.0039 |
| IP         | 13 | 9(0) | 9                 | 0.9487 | 0.0091 |
| MO         | 11 | 5(0) | 5                 | 0.7636 | 0.0067 |
| OS         | 21 | 6(0) | 6                 | 0.6857 | 0.0038 |
| BP         | 18 | 5(1) | 6                 | 0.7250 | 0.0030 |
| CC         | 13 | 3(0) | 2                 | 0.7050 | 0.0020 |
| OR         | 10 | 6(0) | 4                 | 0.9110 | 0.0050 |
| MD         | 18 | 7(0) | 6                 | 0.8950 | 0.0040 |

|    |    |       |   |        |        |
|----|----|-------|---|--------|--------|
| ML | 10 | 5(2)  | 5 | 0.8667 | 0.0081 |
| MN | 11 | 6(2)  | 4 | 0.8364 | 0.0051 |
| OG | 15 | 7(2)  | 4 | 0.8860 | 0,0050 |
| B  | 9  | 2(0)  | 1 | 0.5560 | 0.0009 |
| K  | 17 | 1(0)  | 0 | 0.3820 | 0.0000 |
| M  | 9  | 3(0)  | 2 | 0.6940 | 0.0025 |
| VE | 20 | 10(4) | 8 | 0.8947 | 0.0074 |
| AG | 9  | 2(0)  | 1 | 0.3889 | 0.0016 |
| EP | 9  | 4(0)  | 4 | 0.6944 | 0.0050 |

---

**Table S4:** Population pairwise  $F_{ST}$  estimated for sequences of COI, for *P. nobilis* sampled in 24 localities in the Mediterranean Banyuls (BY), the Ebro Delta (DE), Alicante (AT), Murcia (MU), Ibiza (IB), Mallorca (MA) Elba (EL), Cala Pesciu Cane (CP) and Isola Piana (IP) in Corsica, Baia di Porto Conte (BP), Ospedale Marino (OS), Molaro (MO), Capo Ceraso (CC), Oristano (OR) and Isola di La Maddalena (MD) in Sardinia, Mondello (MN), Milazzo (ML) and Origina di Siracusa (OR) in Sicily, the Venetian Lagoon (VE), Monastir (M), El Bibane (B) and El Ketef (K) at the Tunisian Coast, and in the Aegean Sea: Epanomoi (EP) and Aggeloyesori (AG).  $F_{ST}$  values in grey are significant after Bonferroni correction ( $p < 0.0002$ ).

|    | BY    | DE     | AT     | MU     | IB     | MA     | EL     | IP     | CP     | MO    | OS     | BP     | CC     | OR     | MD     | ML     | MN     | OG    | B     | K     | M     | VE    | AG    | EP |
|----|-------|--------|--------|--------|--------|--------|--------|--------|--------|-------|--------|--------|--------|--------|--------|--------|--------|-------|-------|-------|-------|-------|-------|----|
| BY | 0     |        |        |        |        |        |        |        |        |       |        |        |        |        |        |        |        |       |       |       |       |       |       |    |
| DE | 0,092 | 0      |        |        |        |        |        |        |        |       |        |        |        |        |        |        |        |       |       |       |       |       |       |    |
| AT | 0,075 | 0,028  | 0      |        |        |        |        |        |        |       |        |        |        |        |        |        |        |       |       |       |       |       |       |    |
| MU | 0,150 | 0      | 0,055  | 0      |        |        |        |        |        |       |        |        |        |        |        |        |        |       |       |       |       |       |       |    |
| IB | 0,100 | -0,001 | 0,018  | -0,011 | 0      |        |        |        |        |       |        |        |        |        |        |        |        |       |       |       |       |       |       |    |
| MA | 0,088 | -0,003 | 0,029  | -0,011 | -0,029 | 0      |        |        |        |       |        |        |        |        |        |        |        |       |       |       |       |       |       |    |
| EL | 0,200 | 0,186  | 0,014  | 0,213  | 0,115  | 0,135  | 0      |        |        |       |        |        |        |        |        |        |        |       |       |       |       |       |       |    |
| IP | 0,067 | 0,052  | -0,031 | 0,053  | 0,026  | 0,035  | -0,004 | 0      |        |       |        |        |        |        |        |        |        |       |       |       |       |       |       |    |
| CP | 0,092 | 0,009  | -0,020 | 0,001  | -0,038 | -0,022 | 0,043  | -0,017 | 0      |       |        |        |        |        |        |        |        |       |       |       |       |       |       |    |
| MO | 0,248 | 0,240  | 0,018  | 0,275  | 0,214  | 0,031  | 0,039  | 0,013  | 0,142  | 0     |        |        |        |        |        |        |        |       |       |       |       |       |       |    |
| OS | 0,162 | 0,094  | 0,033  | 0,092  | 0,022  | 0,035  | 0,072  | 0,049  | -0,020 | 0,246 | 0      |        |        |        |        |        |        |       |       |       |       |       |       |    |
| BP | 0,103 | -0,004 | 0,028  | -0,030 | -0,036 | -0,019 | 0,127  | 0,025  | 0,037  | 0,207 | 0,023  | 0      |        |        |        |        |        |       |       |       |       |       |       |    |
| CC | 0,155 | 0,068  | 0,030  | 0,081  | -0,012 | -0,007 | 0,128  | 0,040  | -0,048 | 0,276 | -0,037 | -0,013 | 0      |        |        |        |        |       |       |       |       |       |       |    |
| OR | 0,135 | 0,089  | 0,030  | 0,112  | 0,030  | 0,027  | 0,063  | 0,052  | 0,005  | 0,238 | 0,003  | 0,040  | -0,003 | 0      |        |        |        |       |       |       |       |       |       |    |
| MD | 0,103 | 0,026  | 0,007  | 0,022  | -0,016 | -0,004 | 0,066  | 0,024  | -0,043 | 0,198 | -0,018 | -0,010 | -0,040 | -0,036 | 0      |        |        |       |       |       |       |       |       |    |
| ML | 0,206 | 0,193  | 0,009  | 0,222  | 0,117  | 0,131  | -0,086 | 0,028  | 0,051  | 0,129 | 0,047  | 0,134  | 0,105  | 0,012  | 0,044  | 0      |        |       |       |       |       |       |       |    |
| MN | 0,192 | 0,169  | 0,016  | 0,203  | 0,117  | 0,086  | 0,002  | 0,036  | 0,002  | 0,222 | -0,026 | 0,087  | 0,012  | 0,005  | 0,012  | -0,031 | 0      |       |       |       |       |       |       |    |
| OG | 0,170 | 0,127  | 0,060  | 0,140  | 0,068  | 0,073  | 0,045  | 0,079  | 0,006  | 0,247 | 0,032  | 0,082  | 0,043  | 0,018  | 0,033  | 0,011  | -0,028 | 0     |       |       |       |       |       |    |
| B  | 0,125 | 0,000  | 0,022  | 0,000  | -0,061 | -0,050 | 0,147  | 0,030  | -0,052 | 0,256 | 0,003  | -0,060 | -0,047 | 0,021  | -0,036 | 0,141  | 0,090  | 0,066 | 0     |       |       |       |       |    |
| K  | 0,234 | 0,060  | 0,121  | 0,000  | 0,042  | 0,042  | 0,299  | 0,110  | 0,052  | 0,360 | 0,140  | 0,005  | 0,142  | 0,187  | 0,066  | 0,308  | 0,238  | 0,202 | 0,060 | 0     |       |       |       |    |
| M  | 0,125 | 0,050  | -0,017 | 0,083  | -0,028 | 0,006  | 0,052  | 0,014  | -0,046 | 0,131 | 0,024  | -0,028 | 0,027  | 0,047  | -0,014 | 0,075  | 0,049  | 0,063 | 0,007 | 0,158 | 0     |       |       |    |
| VE | 0,338 | 0,331  | 0,178  | -0,348 | 0,271  | 0,271  | 0,079  | 0,206  | 0,214  | 0,338 | 0,174  | 0,291  | 0,229  | 0,117  | 0,190  | -0,001 | 0,071  | 0,121 | 0,276 | 0,41  | 0,254 | 0     |       |    |
| AG | 0,142 | 0,062  | 0,066  | 0,125  | 0,050  | 0,040  | 0,204  | 0,068  | 0,045  | 0,258 | 0,122  | 0,035  | 0,117  | 0,118  | 0,063  | 0,211  | 0,194  | 0,150 | 0,083 | 0,206 | 0,100 | 0,342 | 0     |    |
| EP | 0,113 | 0,062  | -0,022 | 0,083  | 0,016  | 0,073  | 0,023  | -0,010 | -0,035 | 0,127 | -0,004 | 0,001  | 0,004  | 0,009  | -0,015 | 0,030  | 0,030  | 0,051 | 0,008 | 0,158 | 0,035 | 0,187 | 0,093 | 0  |

**Table S5:** Population pairwise  $F_{ST}$  values estimated for sequences of COI (590 bp), for *Pinna nobilis* sampled in six localities in the Western Mediterranean: Banyuls (BY), the Ebro Delta (DE), Alicante (AT), Murcia (MU), Ibiza (IB), Mallorca (MA).

| Locations  | BY     | DE      | AT     | MU      | IB     | MA |
|------------|--------|---------|--------|---------|--------|----|
| Banyuls    | -      |         |        |         |        |    |
| Ebro Delta | 0.1000 | -       |        |         |        |    |
| Alicante   | 0.0898 | 0.0455  | -      |         |        |    |
| Murcia     | 0.1607 | 0.1250  | 0.0914 | -       |        |    |
| Ibiza      | 0.0902 | -0.0023 | 0.0391 | -0.0951 | -      |    |
| Mallorca   | 0.0677 | 0.0272  | 0.0540 | 0.1120  | 0.0033 | -  |



**Table S6:** Neutrality tests and demographic expansion parameters for *Pinna nobilis* populations in the Western Mediterranean Sea: Banyuls, the Ebro Delta, Alicante, Murcia, Ibiza, Mallorca. Tajima's D and R2 values with \* are significant at  $P < 0.05$  and Fu's Fs values with \*\* are significant at  $P < 0.02$

| Population | Tajima's D | Fu's Fs   | R2      |
|------------|------------|-----------|---------|
| Banyuls    | -0.3983    | -1.2600   | 0.1374  |
| Ebro Delta | -1.3624*   | -1.0811** | 0.2079  |
| Alicante   | -0.8975    | -1.4938   | 0.1085* |
| Murcia     | 0.9862     | 0.8495    | 0.2500  |
| Ibiza      | -1.7411*   | -3.8769** | 0.1000* |
| Mallorca   | -2.2630*   | -3.4235** | 0.0308* |

**Table S7:** Neutrality tests and demographic expansion parameters for *Pinna nobilis* populations in the Mediterranean Sea: Banyuls (BY), the Ebro Delta (DE), Alicante (AT), Murcia (MU), Ibiza (IB), Mallorca (MA) Elba Island (EL), Cala Pesciu Cane (CP) and Isola Piana (IP) in Corsica, Ospedale Marino (OS) and Molarà (MO) in Sardinia, Mondello (MN) and Milazzo (ML) in Sicily and the Venetian Lagoon (VE), Tunisian Coast (TU), and in the Aegean Sea: Epanomoi (EP) and Aggeloyesori (AG). Tajima's D and R2 values with \* are significant at  $P < 0.05$  and Fu's Fs values with \*\* are significant at  $P < 0.02$

| Population | Tajima's D | Fu's Fs   | R2      |
|------------|------------|-----------|---------|
| BY         | -0.5515    | -1.1568   | 0.1617  |
| DE         | -1.3624*   | -1.0811*  | 0.2079  |
| AT         | -1.04488   | -2.6712   | 0.1086* |
| MU         | 0.0000     | 0.0000    | 0.0000  |
| IB         | -1.5622*   | -1.9637** | 0.1528  |
| MA         | -1.6670*   | -1.3446** | 0.1658  |
| EL         | 0.5273     | 0.5924    | 0.2280  |
| CP         | -1.5273*   | -1.9778   | 0.1098  |
| IP         | -0.9093    | -4.7696** | 0.1043  |
| MO         | -0.1587    | -0.8647   | 0.1569  |
| OS         | -1.3652    | -2.3609   | 0.1134  |
| BP         | -1.8490*   | -1.9550   | 0.1230  |
| CC         | -0.4620    | 0.4130    | 0.1643  |
| OR         | -0.520     | -3.237**  | 0.1434  |
| MD         | -1.3680    | -3.380**  | 0.1009  |
| ML         | -0.2979    | -2.8715** | 0.1435  |
| MN         | -0.6564    | -5.0997** | 0.1003  |
| OG         | 0.1190     | -3.3800** | 0.1555  |
| B          | -1.088     | -0.2630** | 0.3143  |
| K          | 0.0000     | 0.0000    | 0.0000  |
| M          | -0.5830    | -0.5320   | 0.1848  |
| VE         | 0.4772     | -0.6276** | 0.1876  |
| AG         | 0.15647    | 0.4774    | 0.1944* |
| EP         | -0.6891    | -0.6273   | 0.1848  |

**Table S8.**  $F_{ST}$  estimates with microsatellite loci and 95% CI among adults of *Pinna nobilis* from 6 Western Mediterranean localities: Banyuls (BY), the Ebro Delta (DE), Alicante (AT), Murcia (MU), Ibiza (IB), Mallorca (MA) without ENA correction and with correction.

|       | Without ENA correction |                   | With ENA correction |                   |
|-------|------------------------|-------------------|---------------------|-------------------|
|       | FST                    | 95% CI            | FST                 | 95% CI            |
| BY-DE | 0.0120                 | (0.0034, 0.0209)  | 0.0101              | (0.0024, 0.0183)  |
| BY-AT | 0.0088                 | (-0.0051, 0.0233) | 0.0094              | (-0.0033, 0.0225) |
| BY-MU | 0.0180                 | (-0.0030, 0.0427) | 0.0141              | (-0.0009, 0.0299) |
| BY-IB | 0.0167                 | (0.0026, 0.0315)  | 0.0200              | (0.0066, 0.0352)  |
| BY-MA | 0.0166                 | (0.0017, 0.0335)  | 0.0177              | (0.0002, 0.0374)  |
| DE-AT | 0.0010                 | (-0.0057, 0.0081) | 0.0032              | (-0.0030, 0.0095) |
| DE-MU | 0.0023                 | (-0.0068, 0.0113) | 0.0038              | (-0.0042, 0.0119) |
| DE-IB | -0.0037                | (-0.0138, 0.0065) | 0.0017              | (-0.0066, 0.0101) |
| DE-MA | 0.0024                 | (-0.0055, 0.0121) | 0.0053              | (-0.0031, 0.0148) |
| AT-MU | -0.0059                | (-0.0143, 0.0054) | -0.0052             | (-0.0119, 0.0021) |
| AT-IB | 0.0056                 | (-0.0054, 0.0178) | 0.0070              | (-0.0030, 0.0182) |
| AT-MA | 0.0022                 | (-0.0075, 0.0119) | 0.0034              | (-0.0043, 0.0108) |
| MU-IB | -0.0036                | (-0.0168, 0.0112) | 0.0018              | (-0.0102, 0.0154) |
| MU-MA | 0.0120                 | (0.0009, 0.0256)  | 0.0092              | (0.0014, 0.0171)  |
| IB-MA | -0.0016                | (-0.0099, 0.0081) | -0.0011             | (-0.0066, 0.0043) |

**Table S9.** Pairwise  $F_{ST}$  among population pairs of *Pinna nobilis* juveniles from the Western Mediterranean estimated with microsatellites. Banyuls (BY) and Mallorca (MA). No significant differentiation was detected with  $F_{ST}$ .

| Locations      | BY (adult) | BY (juvenile) | MA (adult) | MA (juvenile) |
|----------------|------------|---------------|------------|---------------|
| BY (adult)     | -          |               |            |               |
| BY (juveniles) | 0.0131     | -             |            |               |
| MA (adult)     | 0.0356     | -0.0005       | -          |               |
| MA (juvenile)  | 0.0286     | -0.0003       | 0.0091     | -             |

**Table S10:** Migration rates ( $M = m/\mu$ ) calculated with Migrate-n based on 10 microsatellite loci of the sampled *P. nobilis* populations from the Western Mediterranean: Banyuls (BY), the Ebro Delta (DE), Alicante (AT), Murcia (MU), Ibiza (IB), Mallorca (MA). Three different analyses were run; corresponding to the genetically differentiated clusters identified by STRUCTURE.

| Migration rates ( $M = m/\mu$ ) |       |                         |        |                         |       |
|---------------------------------|-------|-------------------------|--------|-------------------------|-------|
| Analysis 1:BY-DE-AT             |       | Analysis 2:AT-MU-IB     |        | Analysis 3: DE-IB-MA    |       |
| $M_{BY \rightarrow DE}$         | 9.050 | $M_{AT \rightarrow MU}$ | 2.517  | $M_{DE \rightarrow IB}$ | 6.767 |
| $M_{BY \rightarrow AT}$         | 1.050 | $M_{AT \rightarrow IB}$ | 4.750  | $M_{DE \rightarrow MA}$ | 4.900 |
| $M_{DE \rightarrow BY}$         | 0.650 | $M_{MU \rightarrow AT}$ | 9.4167 | $M_{IB \rightarrow DE}$ | 3.500 |
| $M_{DE \rightarrow AT}$         | 2.067 | $M_{MU \rightarrow IB}$ | 4.617  | $M_{IB \rightarrow MA}$ | 5.367 |
| $M_{AT \rightarrow BY}$         | 0.417 | $M_{IB \rightarrow AT}$ | 4.683  | $M_{MA \rightarrow DE}$ | 4.500 |
| $M_{AT \rightarrow DE}$         | 8.383 | $M_{IB \rightarrow MU}$ | 2.950  | $M_{MA \rightarrow IB}$ | 2.433 |

**Table S11:** Number of juveniles assigned ( $N=70$ ) to one of the 6 adult populations; Banyuls (BY), the Ebro Delta (DE), Alicante (AT), Murcia (MU), Ibiza (IB), Mallorca (MA). Juveniles with a probability  $<0.05$  of belonging only to a single adult population, were assigned to that population. "Unassigned" juveniles had probabilities  $\geq 0.05$  of belonging to more than one source. Juveniles with probability of origin  $<0.05$  for *all* adult populations were considered to have originated from an unsampled source

| Juveniles | Assigned adult population |    |    |    |    |    | unassigned | unsampled source |
|-----------|---------------------------|----|----|----|----|----|------------|------------------|
|           | BY                        | DE | AT | MU | IB | MA |            |                  |
| BY (35)   | 1                         | 0  | 0  | 0  | 0  | 0  | 5          | 29               |
| MA (35)   | 0                         | 1  | 3  | 0  | 0  | 2  | 2          | 26               |
